# Supplementary material
Source: bioRxiv or medRxiv preprint supplement (https://www.biorxiv.org/highwire/filestream/99655/field_highwire_adjunct_files/0/324905-1.pdf)
Supplement: Supplementary file [file 324905-1.pdf]

## **Supplementary Notes**

### **FibroGENE Cohort Descriptions**

#### **Women's Genome Health Study (WGHS)**

WGHS is part of the Women's Health Study (WHS), a prospective cohort of female North American health-care professionals, who provided a blood sample at baseline and consented for blood-based analyses. All participants were at least 45 years of age, free of cardiovascular disease, cancer, or other major chronic illnesses at the time of consent. Health- and lifestyle-related information were collected via questionnaires at enrollment and follow-up time points. WHS participants were asked whether they had ever been diagnosed with UL and their age at diagnosis. Cases were defined as women who self-reported 'yes' to having a history of UL, while controls were classified as women who self-reported 'no'. Women who reported an age of UL diagnosis < 20 or > 70 years of age were excluded from the analysis. Participants in WGHS were recruited under an IRB-approved protocol by the Partners HealthCare System Human Research Committee. For this study, a total of 12,840 women of white European ancestry were included: 3,375 UL cases and 9,465 controls.

#### **Northern Finland Birth Cohort (NFBC)**

NFBC includes two longitudinal and prospective birth cohorts of white European women and offspring collected at 20-year intervals from the same provinces of Oulu and Lapland in Finland: NFBC1966 and NFBC1986. In this study, we utilized data from NFBC1966. Cases (n=363) with a history of UL were identified through national outpatient and inpatient hospital discharge registers and self-reported diagnosis through postal questionnaire at age 46. The hospital discharge

registers include WHO ICD codes for identification of disease diagnoses and dates for each hospital visit. Controls (n=5,000) were drawn from the rest of the cohort population. Informed consent was obtained from all participants using protocols approved by the Ethical Committee of the Northern Ostrobothnia Hospital District.

### **QIMR Berghofer Medical Research Institute (QIMR)**

In the QIMR cohort women were originally recruited into a study examining predisposition to endometriosis<sup>1</sup> and a twin study of gynecological health<sup>2</sup>. For both studies, women completed questionnaires on various aspects of their reproductive health. Participants who answered “yes” to the “uterine fibroids” option of the question “Have you ever had any of the following conditions?” were selected as cases (n=1,484). Controls (n=3,701) were drawn from twin pairs in the gynecological health study in which both sisters answered “no” to a question about medical history of uterine fibroids (one sample per twin pair). Informed consent was obtained from all participants. Approval for the studies was granted by the Human Research Ethics Committee at the QIMR and the Australian Twin Registry.

### **UK Biobank**

UK Biobank includes samples of over 500,000 individuals (aged 45-69 years) collected in 2006-2010 from across the United Kingdom along with data from electronic health records, interviews with trained research nurses, and web-based questionnaires<sup>3</sup>. For this study, altogether 220,936 women of European ancestry were considered. Based on both hospital-linked medical records and self-report (interview with research nurse), women with a history of UL were selected as cases (n=15,184), while controls (n=205,752) had no previous history of UL. Informed consent was

obtained from all participants. The UK Biobank project is approved by the North West Multi-centre Research Ethics Committee.

### **23andMe Cohort**

Participants were drawn from the customer base of 23andMe (Mountain View, CA, USA). For this study, the 23andMe cohort included 58,655 unrelated European women. Data on participants' history of UL were collected via self-report in online surveys. Medical history of UL was determined with the research question, "Have you ever been diagnosed with uterine fibroids?", which had three response options: yes, no, and not sure. Females who answered "yes" were selected as cases, those who answered "no" as controls, and those who answered "not sure" were excluded from the study, resulting in 15,068 cases and 43,587 controls. All 23andMe research participants provided informed consent and answered surveys online according to a human subjects protocol approved by Ethical and Independent Review Services, an external institutional review board.

### **References**

1. Treloar SA, Wicks J, Nyholt DR, et al. Genomewide linkage study in 1,176 affected sister pair families identifies a significant susceptibility locus for endometriosis on chromosome 10q26. *Am J Hum Genet* 2005;77:365-76.
2. Treloar SA, Do KA, O'Connor VM, O'Connor DT, Yeo MA, Martin NG. Predictors of hysterectomy: an Australian study. *Am J Obstet Gynecol* 1999;180:945-54.

3. Sudlow C, Gallacher J, Allen N, et al. UK biobank: an open access resource for identifying the causes of a wide range of complex diseases of middle and old age. *PLoS Med* 2015;12:e1001779.

## Supplementary Figures and Table

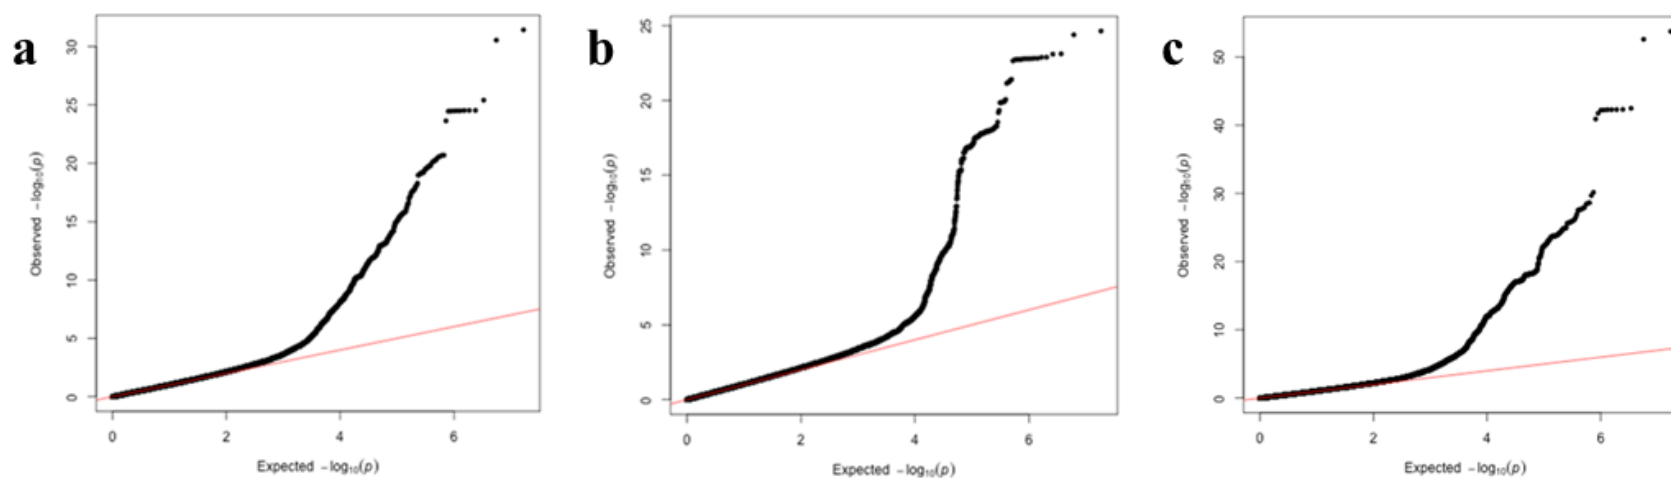

**Supplementary Fig. 1 Quantile-quantile plots.** **a)** Quantile-quantile plot of  $P$ -values observed in meta-analysis of UL GWAS conducted in 244,324 women from population-based cohorts. Genomic inflation factor ( $\gamma_{GC} = 1.025$ ) indicates modest inflation in  $\chi^2$  test statistic. **b)** Quantile-quantile plot of  $P$ -values observed in UL GWAS conducted in 58,655 women from 23andMe direct-to-consumer cohort. Genomic inflation factor ( $\gamma_{GC} = 1.051$ ) indicates modest inflation in the  $\chi^2$  test statistic. **c)** Quantile-quantile plot of  $P$ -values observed in meta-analysis of UL GWAS conducted in 302,979 women from the FibroGENE consortium. Genomic inflation factor ( $\gamma_{GC} = 1.020$ ) indicates modest inflation in the  $\chi^2$  test statistic. The diagonal red line represents expected distribution of observed  $P$ -values under the null hypothesis of no association. Of note, scales of the y axis differ between plots.

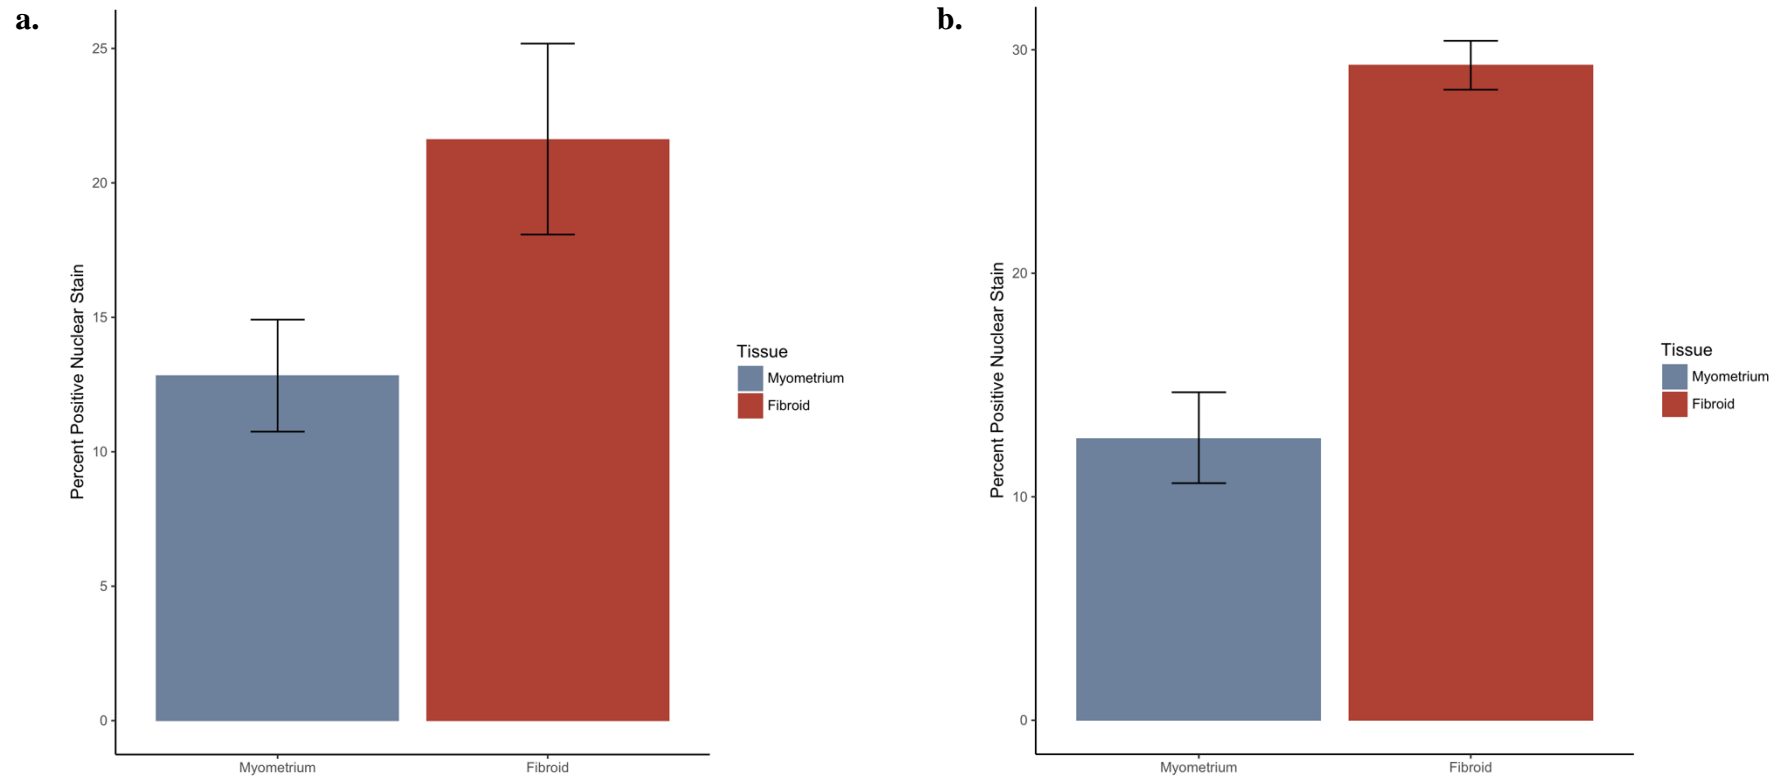

**Supplementary Fig. 2 FOXO1 immunostaining.** **a)** Nuclear expression of FOXO1 is 1.69-fold greater in UL compared to patient-matched myometrial samples. Percent of positive nuclei were quantified in 40 UL and 34 myometrium samples (six patients with two UL) replicated on two separate tissue microarrays. Average number of positively-stained nuclei was significantly higher in UL than myometrial tissue ( $t = 2.60$ , degrees of freedom (df) = 39,  $P = 0.01$ ). **b)** Nuclear expression of FOXO1 is 2.32-fold greater in UL compared to myometrial samples. Percent of positive nuclei were quantified in 335 UL and 35 myometrium samples replicated on two separate tissue microarrays. Average number of positively-stained nuclei was significantly higher in UL than myometrial tissue ( $t = 7.22$ , df = 56,  $P = 1.52 \times 10^{-9}$ ).

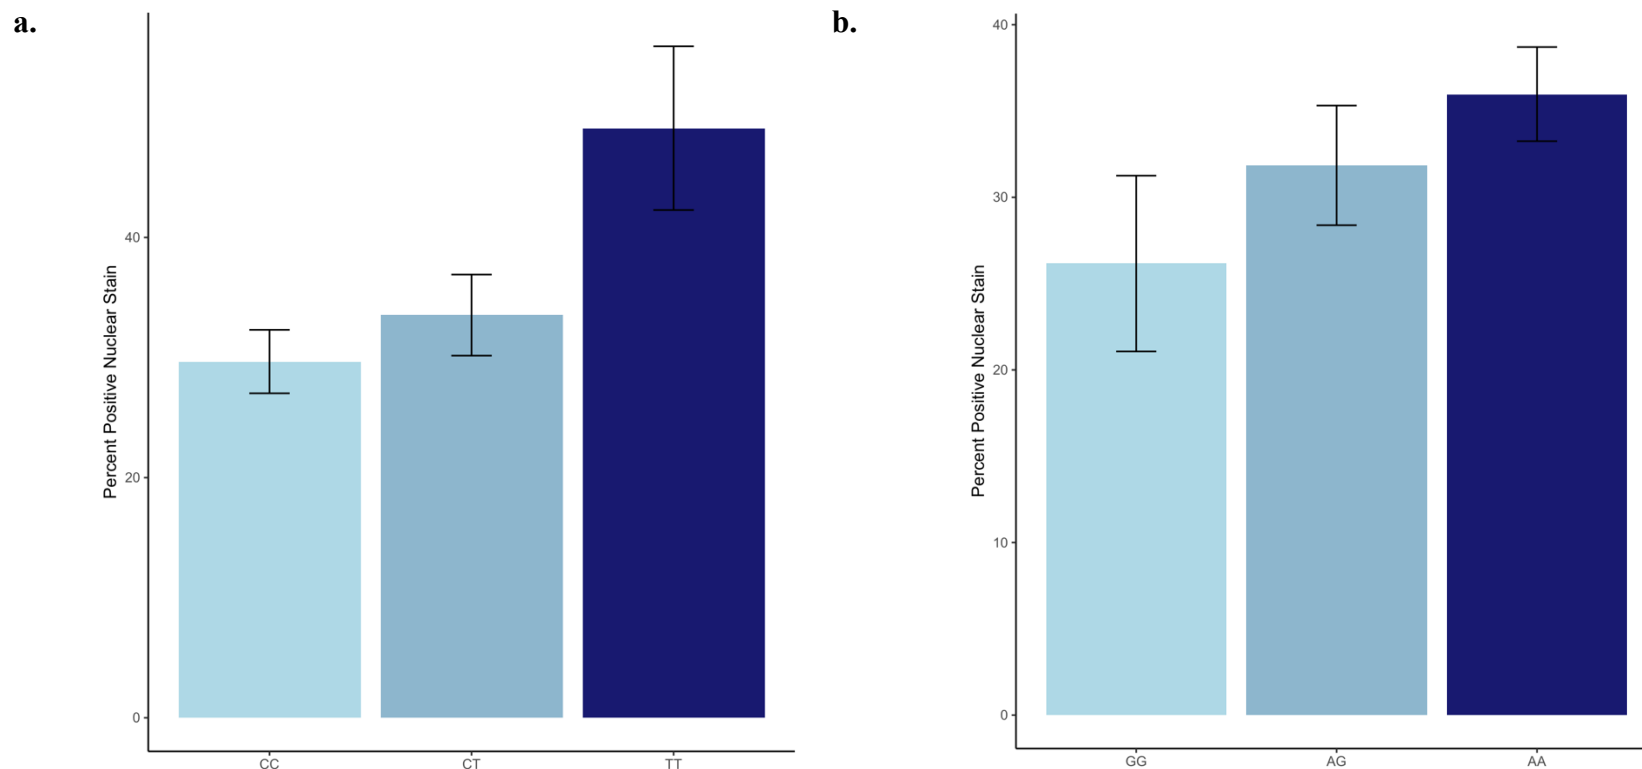

**Supplementary Fig. 3 Stratification of nuclear FOXO1 expression by genotype.** FOXO1 expression and genotypes were quantified and determined in a total of 109 UL. **a)** One-way analysis of variance showed a significant relationship between allelic dosage of the rs6563799 risk variant [T] and FOXO1 expression ( $F = 3.2$ ,  $df = 2$ ,  $P = 0.047$ ). To compare mean expression of UL homozygous for the risk variant [T] against those with C/C or C/T genotypes, we performed an unpaired  $t$ -test ( $t = 2.51$ ,  $df = 8$ ,  $P = 0.035$ ). **b)** One-way analysis of variance showed no significant relationship between allelic dosage of the rs7986407 risk variant [A] and FOXO1 expression ( $F = 1.5$ ,  $df = 2$ ,  $P = 0.22$ ). To compare mean expression of UL homozygous for the risk variant against those with G/G or G/A genotypes, we performed an unpaired  $t$ -test ( $t = 1.49$ ,  $df = 105$ ,  $P = 0.14$ ).

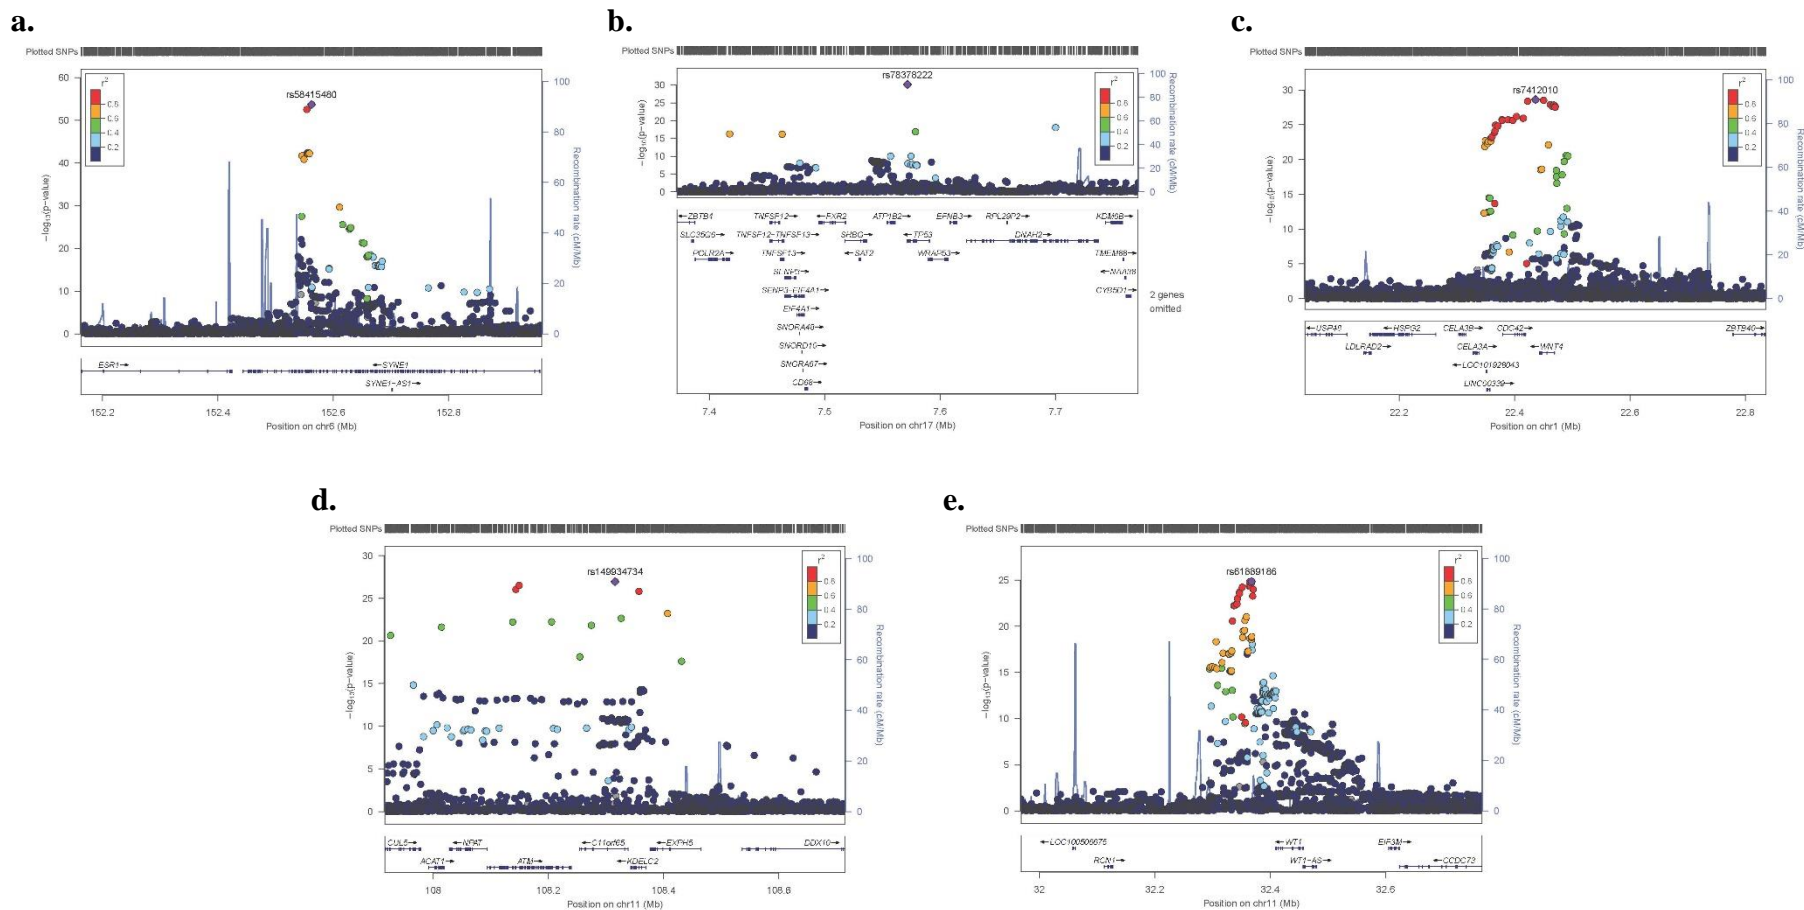

**Supplementary Fig. 4 Regional association plots for five top loci in the meta-analysis across all cohorts. a) Chromosome 6q25.2. b) Chromosome 17p13.1. c) Chromosome 1p36.12. d) Chromosome 11q22.3. e) Chromosome 11p13. The labeled SNP represents the most significant SNP for each locus. SNP association  $P$ -value is shown on the y axis, while SNP position (with gene annotation) appears on the x axis. Each SNP is colored according to the strength of LD with the lead SNP. Plots were produced in LocusZoom.**



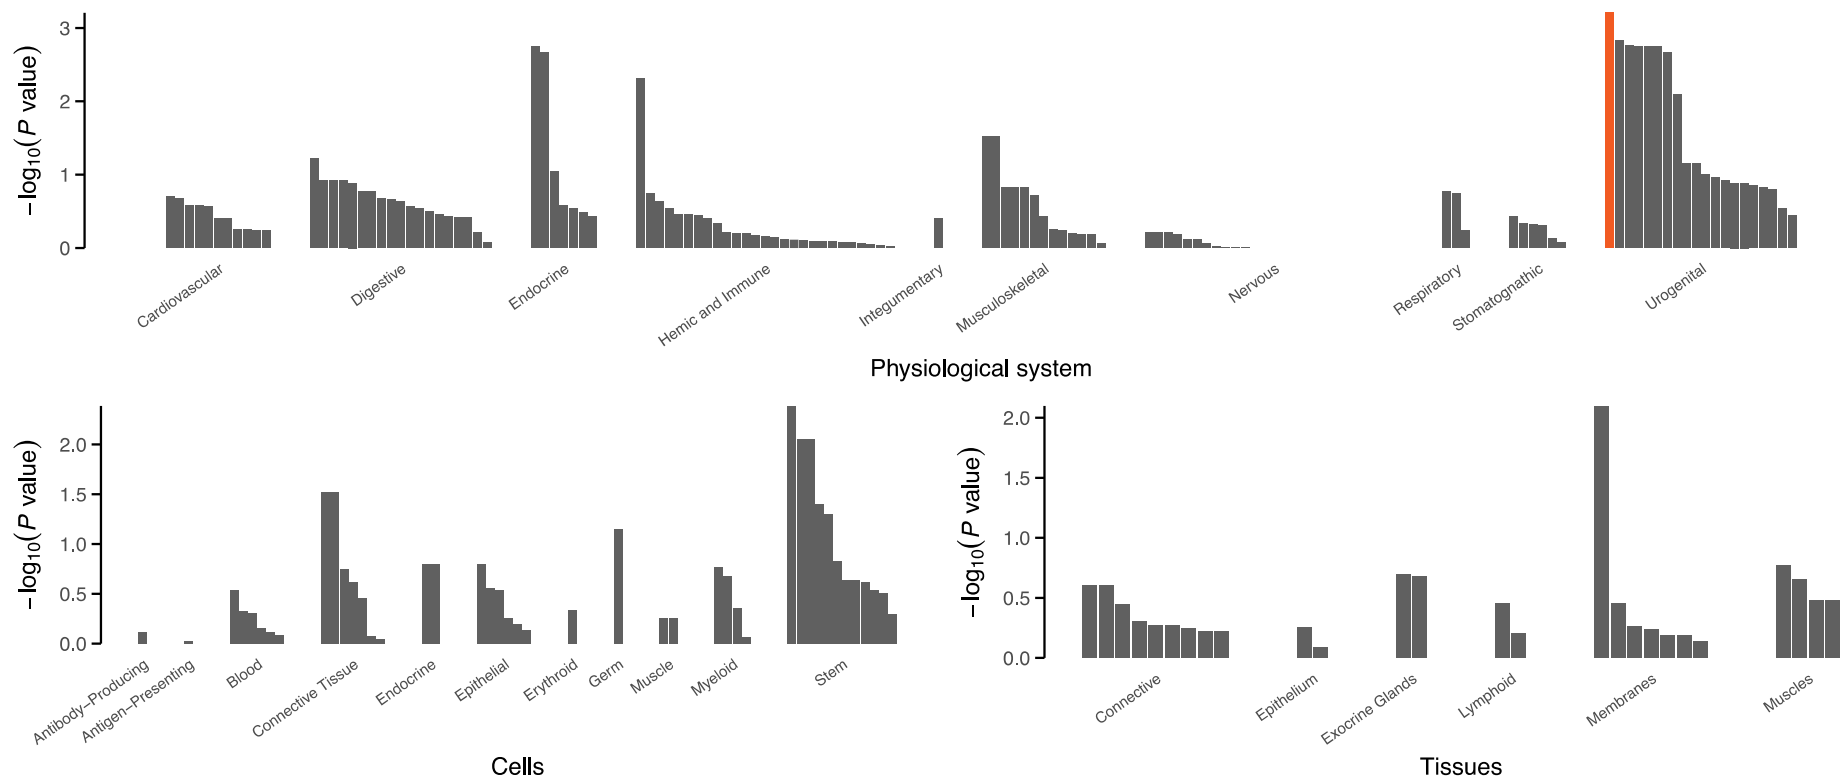

**Supplementary Fig. 5 Tissue enrichment analysis.** Results from DEPICT-based tissue enrichment analysis of 162 independent lead SNPs identified from 5,185 SNPs with suggestive ( $P < 1 \times 10^{-5}$ ) or significant associations ( $P < 5 \times 10^{-8}$ ). Red indicates significant gene-set enrichment with  $FDR < 0.05$ .

**Supplementary Table 1. GWAS Cohorts.** Four conventional population-based cohorts and one direct-to-consumer cohort from the FibroGENE consortium were included in the genome-wide association analyses.

| <b>Cohorts</b>                                  | <b>Cases<sup>a</sup></b> | <b>Controls<sup>a</sup></b> | <b>Total</b>   |
|-------------------------------------------------|--------------------------|-----------------------------|----------------|
| <b>Conventional Population-Based Cohorts</b>    | 20,406                   | 223,918                     | 244,324        |
| Women's Genome Health Study (WGHS)              | 3,375                    | 9,465                       | 12,840         |
| Northern Finnish Birth Cohort (NFBC)            | 363                      | 5,000                       | 5,363          |
| Queensland Institute of Medical Research (QIMR) | 1,484                    | 3,701                       | 5,185          |
| UK Biobank                                      | 15,184                   | 205,752                     | 220,936        |
| <b>Direct-to-Consumer Cohort</b>                |                          |                             |                |
| 23andMe                                         | 15,068                   | 43,587                      | 58,655         |
| <b>Total</b>                                    | <b>35,474</b>            | <b>267,505</b>              | <b>302,979</b> |

<sup>a</sup> Cases and controls defined solely based on self-report or clinically documented history of uterine leiomyomata

**Supplementary Table 2. Statistics of GWAS Cohorts.** Overview of genomic inflation factor ( $\gamma_{GC}$ ) used for adjustments and total number of SNPs analyzed in the GWA analyses.

| <b>Cohort</b>        | $\gamma_{GC}$ | <b>N<sub>SNP</sub></b> |
|----------------------|---------------|------------------------|
| <b>WGHS</b>          | 1.008         | 8,767,907              |
| <b>NFBC</b>          | 1.006         | 8,424,735              |
| <b>QIMR</b>          | 0.998         | 8,279,309              |
| <b>UKBB</b>          | 1.061         | 10,308,721             |
| <b>23andMe</b>       | 1.051         | 9,164,495              |
| <b>Meta-Analysis</b> | 1.020         | 8,519,088              |

**Supplementary Table 3. Results of the discovery-phase meta-analysis.** Overview of peak SNPs with significant associations ( $P < 5 \times 10^{-8}$ ) in meta-analyses of GWAS conducted in four population-based cohorts across 244,324 women of white European ancestry.

| Locus                | rsID        | <i>P</i>             | OR (95% CI)        | <i>P</i> <sub>Het</sub>  | Genes of interest <sup>a</sup> |
|----------------------|-------------|----------------------|--------------------|--------------------------|--------------------------------|
| 1p36.12 <sup>b</sup> | rs2235529   | 7.39e <sup>-21</sup> | 1.14 (1.11 - 1.17) | <b>0.015<sup>d</sup></b> | <i>WNT4, CDC42</i>             |
| 1q24.3               | rs59760198  | 2.76e <sup>-08</sup> | 1.06 (1.04 - 1.08) | 0.412                    | <i>DNM3</i>                    |
| 2p25.1 <sup>b</sup>  | rs10929757  | 1.19e <sup>-12</sup> | 1.07 (1.05 - 1.10) | 0.368                    | <i>GREB1</i>                   |
| 3q26.2               | rs2293607   | 4.06e <sup>-08</sup> | 1.07 (1.04 - 1.09) | 0.007                    | <i>TERC</i>                    |
| 4q12                 | rs4864806   | 5.95e <sup>-14</sup> | 1.16 (1.12 - 1.21) | 0.302                    | <i>LNXI, PDGFRA</i>            |
| 4q13.3               | rs12640488  | 3.83e <sup>-10</sup> | 1.06 (1.04 - 1.09) | 0.087                    | <i>SULT1B1</i>                 |
| 5p15.33              | rs72709458  | 6.07e <sup>-15</sup> | 1.11 (1.08 - 1.13) | 0.050                    | <i>TERT</i>                    |
| 5q35.2               | rs2456181   | 5.62e <sup>-09</sup> | 1.07 (1.05 - 1.09) | 0.021                    | <i>ZNF346, UIMC1</i>           |
| 6q25.2 <sup>b</sup>  | rs58415480  | 3.65e <sup>-32</sup> | 1.18 (1.15 - 1.21) | 0.204                    | <i>SYNE1, ESRI</i>             |
| 9p24.3               | rs10815466  | 5.63e <sup>-13</sup> | 1.11 (1.08 - 1.14) | 0.139                    | <i>ANKRD15</i>                 |
| 10q24.3 <sup>c</sup> | rs9419958   | 1.20e <sup>-09</sup> | 1.09 (1.06 - 1.12) | 0.243                    | <i>OBFC1, SLK</i>              |
| 11p15.5 <sup>c</sup> | rs547025    | 4.78e <sup>-13</sup> | 1.15 (1.11 - 1.19) | 0.223                    | <i>RIC8A, BET1L</i>            |
| 11p14.1 <sup>b</sup> | rs11031006  | 2.91e <sup>-08</sup> | 1.08 (1.05 - 1.12) | 0.134                    | <i>FSHB</i>                    |
| 11p13                | rs11031731  | 2.04e <sup>-21</sup> | 1.14 (1.11 - 1.17) | 0.136                    | <i>WT1</i>                     |
| 11p13                | rs2553772   | 1.20e <sup>-08</sup> | 1.06 (1.04 - 1.08) | 0.206                    | <i>PDHX, CD44</i>              |
| 11q22.3              | rs149934734 | 7.05e <sup>-19</sup> | 1.34 (1.26 - 1.43) | <b>0.035<sup>d</sup></b> | <i>C11orf65, KDELC2</i>        |
| 12q13.11             | rs9669403   | 1.57e <sup>-09</sup> | 1.06 (1.04 - 1.09) | 0.513                    | <i>SLC38A2</i>                 |
| 12q24.31             | rs641760    | 7.64e <sup>-09</sup> | 1.07 (1.05 - 1.10) | 0.446                    | <i>PITPNM2</i>                 |
| 13q14.11             | rs1986649   | 1.07e <sup>-11</sup> | 1.09 (1.06 - 1.11) | 0.140                    | <i>FOXO1</i>                   |
| 16q12.1              | rs66998222  | 2.29e <sup>-08</sup> | 1.07 (1.05 - 1.10) | 0.052                    |                                |
| 17p13.1              | rs78378222  | 3.84e <sup>-26</sup> | 1.64 (1.50 - 1.80) | <b>0.001<sup>d</sup></b> | <i>SHBG, TP53</i>              |
| 20p12.3              | rs16991615  | 2.83e <sup>-08</sup> | 1.12 (1.08 - 1.17) | 0.963                    | <i>MCM8, TRMT6</i>             |
| 22q13.1 <sup>c</sup> | rs12484776  | 4.08e <sup>-12</sup> | 1.09 (1.06 - 1.12) | 0.437                    | <i>TNRC6B</i>                  |
| Xp22.2               | rs181473301 | 2.24e <sup>-11</sup> | 1.98 (1.62 - 2.42) | < 0.001                  |                                |

<sup>a</sup> ≤ 300 kb distant from association signal  
<sup>b</sup> Loci previously associated with endometriosis  
<sup>c</sup> Loci previously associated with UL  
<sup>d</sup> Peak SNP had significant heterogeneity ( $P < 0.05$ ), but second significant SNP in LD had non-significant heterogeneity.

**Supplementary Table 4. Results from meta-analysis across all cohorts.** Overview of peak SNPs with significant associations ( $P < 5 \times 10^{-8}$ ) in meta-analyses of GWAS conducted in 302,979 women of white European ancestry.

| Locus                | rsID               | $P_{\text{Meta}}$          | OR (95% CI)               | Genes of interest <sup>a</sup> |
|----------------------|--------------------|----------------------------|---------------------------|--------------------------------|
| 1p36.12 <sup>b</sup> | rs7412010          | 2.43e <sup>-29</sup>       | 1.13 (1.11 – 1.16)        | <i>WNT4, CDC42</i>             |
| <b>2p23.2</b>        | <b>rs55819434</b>  | <b>5.59e<sup>-09</sup></b> | <b>1.09 (1.06 – 1.12)</b> | <b><i>BABAM2</i></b>           |
| 2p25.1 <sup>b</sup>  | rs35417544         | 2.32e <sup>-19</sup>       | 1.09 (1.07 – 1.10)        | <i>GREB1</i>                   |
| 3q26.2               | rs35446936         | 1.03e <sup>-08</sup>       | 1.06 (1.04 – 1.08)        | <i>TERC</i>                    |
| 4q12                 | rs62323682         | 4.92e <sup>-18</sup>       | 1.15 (1.12 – 1.19)        | <i>LNXI, PDGFRA</i>            |
| 4q13.3               | rs12640488         | 4.00e <sup>-14</sup>       | 1.06 (1.05 – 1.08)        | <i>SULT1B1</i>                 |
| <b>4q22.3</b>        | <b>rs4699299</b>   | <b>4.72e<sup>-08</sup></b> | <b>1.05 (1.03 – 1.07)</b> | <b><i>PDLIM5</i></b>           |
| 5p15.33              | rs72709458         | 4.66e <sup>-21</sup>       | 1.10 (1.08 – 1.13)        | <i>TERT</i>                    |
| 5q35.2               | rs2456181          | 1.14e <sup>-11</sup>       | 1.06 (1.04 – 1.08)        | <i>ZNF346, UIMC1</i>           |
| <b>6p21.31</b>       | <b>rs116251328</b> | <b>2.95e<sup>-08</sup></b> | <b>1.15 (1.09 – 1.21)</b> | <b><i>GRM4, HMGA1</i></b>      |
| 6q25.2 <sup>b</sup>  | rs58415480         | 1.86e <sup>-54</sup>       | 1.19 (1.17 – 1.22)        | <i>SYNE1, ESR1</i>             |
| <b>7q31.2</b>        | <b>rs2270206</b>   | <b>4.64e<sup>-08</sup></b> | <b>1.06 (1.04 – 1.09)</b> | <b><i>WNT2</i></b>             |
| 9p24.3               | rs10976689         | 2.37e <sup>-13</sup>       | 1.06 (1.05 – 1.08)        | <i>ANKRD15</i>                 |
| 10q24.3 <sup>c</sup> | rs9419958          | 1.05e <sup>-16</sup>       | 1.10 (1.08 – 1.13)        | <i>OBFC1, SLK</i>              |
| <b>10p11.22</b>      | <b>rs10508765</b>  | <b>1.51e<sup>-10</sup></b> | <b>1.07 (1.05 – 1.09)</b> | <b><i>ZEB1, ARHGAP12</i></b>   |
| 11p15.5 <sup>c</sup> | rs547025           | 1.45e <sup>-14</sup>       | 1.13 (1.09 – 1.16)        | <i>RIC8A, BETIL</i>            |
| 11p14.1 <sup>b</sup> | rs11031006         | 5.65e <sup>-15</sup>       | 1.10 (1.07 – 1.12)        | <i>FSHB</i>                    |
| 11p13                | rs61889186         | 1.39e <sup>-25</sup>       | 1.12 (1.10 – 1.15)        | <i>WT1</i>                     |
| 11p13                | rs2785202          | 6.94e <sup>-14</sup>       | 1.06 (1.05 – 1.08)        | <i>PDHX, CD44</i>              |
| 11q22.3              | rs149934734        | 1.10e <sup>-27</sup>       | 1.33 (1.26 – 1.40)        | <i>C11orf65, KDELC2</i>        |
| 12q13.11             | rs2131371          | 1.62e <sup>-18</sup>       | 1.08 (1.06 – 1.10)        | <i>SLC38A2</i>                 |
| <b>12q15</b>         | <b>rs11178393</b>  | <b>3.34e<sup>-08</sup></b> | <b>1.08 (1.05 – 1.10)</b> | <b><i>PTPRR</i></b>            |
| 12q24.31             | rs28583837         | 2.31e <sup>-08</sup>       | 1.06 (1.04 – 1.08)        | <i>PITPNM2</i>                 |
| 13q14.11             | rs117245733        | 5.69e <sup>-14</sup>       | 1.31 (1.21 – 1.39)        | <i>FOXO1</i>                   |
| 17p13.1              | rs78378222         | 7.11e <sup>-31</sup>       | 1.54 (1.43 – 1.66)        | <i>SHBG, TP53</i>              |
| 20p12.3              | rs16991615         | 8.82e <sup>-10</sup>       | 1.11 (1.07 – 1.14)        | <i>MCM8, TRMT6</i>             |
| 22q13.1 <sup>c</sup> | rs4821939          | 7.83e <sup>-16</sup>       | 1.08 (1.06 – 1.10)        | <i>TNRC6B</i>                  |

**Bolded loci are novel discoveries in the meta-analysis.**  
<sup>a</sup> ≤ 300 kb distant from association signal  
<sup>b</sup> Loci previously associated with endometriosis  
<sup>c</sup> Loci previously associated with UL

**Supplementary Table 5.** Independent loci identified from 5,185 SNPs with suggestive ( $P < 1 \times 10^{-5}$ ) or significant associations ( $P < 5 \times 10^{-8}$ ) for DEPICT analyses.

| Chr | BP        | SNP         | P        | NTotal | Nsig |
|-----|-----------|-------------|----------|--------|------|
| 1   | 22384713  | rs12035094  | 2.03e-09 | 16     | 12   |
| 1   | 22436446  | rs7412010   | 2.43e-29 | 312    | 57   |
| 1   | 22508922  | rs2807370   | 6.91e-07 | 115    | 51   |
| 1   | 28793149  | rs61748637  | 6.19e-06 | 88     | 36   |
| 1   | 59718153  | rs147305679 | 2.40e-06 | 1      | 0    |
| 1   | 163924366 | rs1579807   | 9.83e-06 | 136    | 46   |
| 1   | 172137119 | rs672740    | 1.26e-07 | 347    | 82   |
| 1   | 242011344 | rs1776180   | 3.76e-06 | 132    | 19   |
| 1   | 244314952 | rs2183478   | 5.77e-07 | 7      | 3    |
| 1   | 244364293 | rs12745147  | 8.44e-06 | 36     | 1    |
| 1   | 249191706 | rs4335411   | 6.77e-08 | 47     | 9    |
| 2   | 11306978  | rs3951242   | 3.04e-08 | 385    | 149  |
| 2   | 11575780  | rs77332934  | 2.83e-06 | 3      | 1    |
| 2   | 11660955  | rs77294520  | 5.87e-09 | 33     | 1    |
| 2   | 11680403  | rs35417544  | 2.32e-19 | 117    | 0    |
| 2   | 12102123  | rs62115045  | 7.17e-08 | 131    | 21   |
| 2   | 17942230  | rs2081601   | 5.40e-06 | 132    | 25   |
| 2   | 27598097  | rs4665972   | 6.21e-06 | 360    | 139  |
| 2   | 28072550  | rs57309923  | 4.48e-06 | 145    | 142  |
| 2   | 28333109  | rs55819434  | 5.59e-09 | 379    | 18   |
| 2   | 62782323  | rs17025727  | 5.07e-06 | 27     | 19   |
| 2   | 67090367  | rs17631680  | 9.39e-06 | 46     | 21   |
| 2   | 100109913 | rs10186340  | 6.17e-07 | 591    | 24   |
| 2   | 135292926 | rs542851    | 1.39e-06 | 267    | 123  |
| 2   | 135778708 | rs7593284   | 1.59e-06 | 93     | 3    |
| 2   | 136290607 | rs59605931  | 2.19e-07 | 968    | 22   |
| 2   | 173150012 | rs68130068  | 4.17e-07 | 121    | 96   |
| 2   | 177770340 | rs6712128   | 1.05e-06 | 359    | 106  |
| 2   | 202865534 | rs12612045  | 1.10e-07 | 200    | 92   |
| 2   | 226531574 | rs10933107  | 6.88e-06 | 292    | 161  |
| 2   | 239888052 | rs6543539   | 2.91e-06 | 105    | 15   |
| 3   | 4716214   | rs3804984   | 2.42e-07 | 23     | 11   |
| 3   | 4719426   | rs4684436   | 1.51e-07 | 33     | 20   |
| 3   | 11649334  | rs11712416  | 5.69e-07 | 339    | 106  |
| 3   | 24223206  | rs4858583   | 1.09e-06 | 123    | 39   |
| 3   | 27331854  | rs543882    | 1.31e-06 | 904    | 331  |
| 3   | 57957040  | rs1658367   | 4.68e-06 | 400    | 129  |
| 3   | 128119565 | rs760383    | 2.32e-06 | 575    | 278  |
| 3   | 156786437 | rs10936060  | 2.52e-06 | 203    | 100  |
| 3   | 169486508 | rs35446936  | 1.03e-08 | 217    | 100  |
| 3   | 183558402 | rs3732581   | 1.29e-06 | 438    | 320  |
| 3   | 185490240 | rs13073992  | 5.37e-08 | 109    | 10   |
| 4   | 8040251   | rs114887409 | 4.65e-06 | 9      | 3    |
| 4   | 18223649  | rs150497359 | 3.44e-06 | 187    | 145  |
| 4   | 31290995  | rs150544012 | 3.62e-06 | 8      | 6    |
| 4   | 53858948  | rs116112143 | 2.20e-06 | 71     | 26   |
| 4   | 54550174  | rs62323682  | 4.92e-18 | 65     | 17   |
| 4   | 55804691  | rs114726826 | 5.26e-06 | 6      | 3    |
| 4   | 70600738  | rs12640488  | 4.00e-14 | 327    | 74   |
| 4   | 70700567  | rs75699008  | 2.41e-07 | 31     | 20   |
| 4   | 95501166  | rs4699299   | 4.72e-08 | 279    | 24   |
| 4   | 99952710  | rs1037475   | 3.30e-06 | 599    | 328  |
| 4   | 103761862 | rs223369    | 7.60e-07 | 896    | 59   |

| Chr | BP        | SNP         | P        | NTotal | Nsig |
|-----|-----------|-------------|----------|--------|------|
| 5   | 1267356   | rs4246742   | 1.83e-06 | 46     | 4    |
| 5   | 1277577   | rs33961405  | 1.30e-08 | 5      | 2    |
| 5   | 1283755   | rs72709458  | 4.66e-21 | 35     | 0    |
| 5   | 1322654   | rs34880677  | 3.21e-06 | 80     | 3    |
| 5   | 132436392 | rs28548389  | 4.60e-06 | 419    | 152  |
| 5   | 141600807 | rs72801930  | 5.32e-06 | 1      | 1    |
| 5   | 176450837 | rs2456181   | 1.14e-11 | 173    | 25   |
| 6   | 31380422  | rs115387084 | 7.39e-06 | 1769   | 1436 |
| 6   | 31580507  | rs114075146 | 6.28e-06 | 381    | 241  |
| 6   | 34177510  | rs116251328 | 2.95e-08 | 109    | 0    |
| 6   | 34181995  | rs9357174   | 4.04e-06 | 375    | 324  |
| 6   | 36651284  | rs3176348   | 6.23e-06 | 152    | 24   |
| 6   | 37108380  | rs7741267   | 8.60e-06 | 83     | 14   |
| 6   | 70973766  | rs12195966  | 6.44e-06 | 172    | 125  |
| 6   | 108944165 | rs3813498   | 2.04e-07 | 193    | 98   |
| 6   | 109376118 | rs11153158  | 3.76e-06 | 283    | 21   |
| 6   | 152526179 | rs2763025   | 8.73e-08 | 35     | 4    |
| 6   | 152539054 | rs1408461   | 7.29e-19 | 55     | 7    |
| 6   | 152562271 | rs58415480  | 1.86e-54 | 113    | 9    |
| 6   | 152592680 | rs75510204  | 1.67e-09 | 6      | 1    |
| 6   | 152593102 | rs6904757   | 4.61e-16 | 34     | 2    |
| 6   | 152626689 | rs9383984   | 3.74e-07 | 0      | 0    |
| 6   | 152629586 | rs9371581   | 1.34e-07 | 27     | 7    |
| 6   | 152644111 | rs7738189   | 2.98e-06 | 14     | 8    |
| 6   | 152648145 | rs9371585   | 8.62e-10 | 96     | 22   |
| 6   | 152658342 | rs201427355 | 5.59e-09 | 0      | 0    |
| 6   | 152872272 | rs9397523   | 8.48e-10 | 141    | 80   |
| 6   | 152880372 | rs148780923 | 5.31e-08 | 9      | 0    |
| 7   | 20781414  | rs62453391  | 9.12e-06 | 219    | 52   |
| 7   | 33048397  | rs4723230   | 4.80e-06 | 360    | 85   |
| 7   | 116913567 | rs2270206   | 4.64e-08 | 110    | 35   |
| 7   | 120759424 | rs2968338   | 1.03e-07 | 316    | 22   |
| 7   | 130620723 | rs35908158  | 3.32e-06 | 53     | 3    |
| 8   | 30310335  | rs13275869  | 7.03e-06 | 326    | 164  |
| 8   | 129518281 | rs1516980   | 1.38e-06 | 333    | 20   |
| 9   | 680714    | rs10815466  | 2.17e-12 | 221    | 63   |
| 9   | 720492    | rs10976044  | 1.11e-06 | 11     | 7    |
| 9   | 804886    | rs10976689  | 2.37e-13 | 179    | 70   |
| 9   | 827224    | rs2277163   | 2.43e-07 | 56     | 11   |
| 9   | 860004    | rs7021646   | 2.29e-07 | 80     | 33   |
| 9   | 876418    | rs11790408  | 1.42e-07 | 89     | 24   |
| 9   | 92116564  | rs11265780  | 3.43e-06 | 304    | 195  |
| 9   | 137174079 | rs11185709  | 6.54e-06 | 10     | 7    |
| 10  | 21806832  | rs946711    | 9.29e-07 | 402    | 220  |
| 10  | 31968783  | rs10508765  | 1.50e-10 | 129    | 25   |
| 10  | 68370790  | rs2394216   | 4.86e-07 | 142    | 32   |
| 10  | 90091540  | rs1426619   | 2.12e-07 | 358    | 28   |
| 10  | 105659369 | rs3850670   | 3.89e-08 | 259    | 141  |
| 10  | 105675946 | rs9419958   | 1.04e-16 | 185    | 26   |
| 10  | 126782331 | rs1152677   | 6.02e-06 | 163    | 53   |
| 11  | 218141    | rs3847647   | 9.49e-07 | 234    | 145  |
| 11  | 224063    | rs12222188  | 2.70e-10 | 36     | 6    |
| 11  | 232855    | rs547025    | 1.45e-14 | 67     | 11   |
| 11  | 270071    | rs10751644  | 1.99e-06 | 30     | 18   |
| 11  | 14242862  | rs147235561 | 9.30e-06 | 43     | 15   |
| 11  | 30226528  | rs11031006  | 5.65e-15 | 388    | 5    |
| 11  | 30561123  | rs523639    | 4.37e-06 | 198    | 127  |
| 11  | 32359961  | rs12807010  | 2.69e-06 | 29     | 23   |

| <b>Chr</b> | <b>BP</b> | <b>SNP</b>  | <b>P</b> | <b>NTotal</b> | <b>Nsig</b> |
|------------|-----------|-------------|----------|---------------|-------------|
| 11         | 32367570  | rs61889186  | 1.39e-25 | 460           | 5           |
| 11         | 32371215  | rs932503    | 4.44e-13 | 46            | 13          |
| 11         | 32433044  | rs5030233   | 6.68e-06 | 67            | 63          |
| 11         | 32441111  | rs7114908   | 1.93e-11 | 119           | 4           |
| 11         | 32911258  | rs4633439   | 6.39e-06 | 395           | 287         |
| 11         | 35084835  | rs2785202   | 6.94e-14 | 176           | 10          |
| 11         | 108315606 | rs149934734 | 1.10e-27 | 53            | 2           |
| 11         | 108359689 | rs72993806  | 4.84e-15 | 185           | 39          |
| 11         | 108371924 | rs79088165  | 2.78e-09 | 123           | 103         |
| 11         | 128363717 | rs11604768  | 2.93e-06 | 50            | 24          |
| 12         | 46650396  | rs34792811  | 5.59e-08 | 8             | 1           |
| 12         | 46796522  | rs2131371   | 1.62e-18 | 447           | 5           |
| 12         | 46949205  | rs12230643  | 2.88e-09 | 29            | 6           |
| 12         | 54566379  | rs12827282  | 2.70e-06 | 106           | 49          |
| 12         | 66836183  | rs76103439  | 5.88e-06 | 13            | 7           |
| 12         | 71150658  | rs11178393  | 3.34e-08 | 76            | 11          |
| 12         | 110507991 | rs148526428 | 6.14e-07 | 371           | 37          |
| 12         | 123296204 | rs138062324 | 7.52e-06 | 46            | 38          |
| 12         | 123863620 | rs28583837  | 2.31e-08 | 478           | 104         |
| 13         | 40300545  | rs9548898   | 3.22e-09 | 236           | 27          |
| 13         | 40487456  | rs9532454   | 2.77e-07 | 69            | 0           |
| 13         | 40706991  | rs12872985  | 5.69e-06 | 109           | 24          |
| 13         | 40723944  | rs117245733 | 5.68e-14 | 1             | 0           |
| 13         | 40736289  | rs6563799   | 2.23e-10 | 106           | 15          |
| 13         | 40836913  | rs17061057  | 2.76e-06 | 18            | 5           |
| 13         | 40843805  | rs6563812   | 7.88e-09 | 29            | 2           |
| 13         | 41179798  | rs7986407   | 2.02e-13 | 393           | 73          |
| 13         | 71715091  | rs61957931  | 8.56e-06 | 90            | 20          |
| 14         | 29977679  | rs1191561   | 7.92e-06 | 13            | 0           |
| 14         | 53163421  | rs145576330 | 6.11e-06 | 61            | 39          |
| 14         | 93101528  | rs10147131  | 5.98e-06 | 105           | 37          |
| 15         | 68213895  | rs436903    | 6.72e-07 | 399           | 132         |
| 15         | 68611051  | rs60103704  | 7.59e-06 | 109           | 22          |
| 16         | 51481596  | rs66998222  | 5.05e-08 | 193           | 29          |
| 16         | 75158095  | rs62059211  | 4.37e-06 | 114           | 71          |
| 17         | 7540735   | rs7210750   | 1.57e-09 | 151           | 22          |
| 17         | 7571752   | rs78378222  | 7.11e-31 | 21            | 0           |
| 17         | 27004703  | rs7207976   | 6.34e-06 | 111           | 30          |
| 17         | 29250911  | rs11867227  | 7.61e-07 | 132           | 50          |
| 17         | 41370074  | rs34981932  | 4.63e-06 | 617           | 111         |
| 19         | 22260842  | rs62110991  | 1.58e-06 | 970           | 82          |
| 19         | 22660286  | rs11878410  | 8.58e-06 | 10            | 7           |
| 20         | 5948227   | rs16991615  | 8.82e-10 | 39            | 26          |
| 20         | 56019801  | rs8115191   | 2.88e-07 | 101           | 50          |
| 20         | 62441599  | rs6062322   | 9.37e-06 | 140           | 74          |
| 21         | 24595021  | rs182209255 | 1.85e-06 | 6             | 4           |
| 21         | 36445050  | rs6517273   | 5.83e-06 | 90            | 35          |
| 22         | 36683555  | rs9610482   | 3.77e-07 | 111           | 43          |
| 22         | 40535963  | rs2179422   | 8.96e-07 | 189           | 43          |
| 22         | 40546525  | rs79499264  | 2.12e-07 | 15            | 3           |
| 22         | 40659251  | rs4821939   | 7.83e-16 | 504           | 39          |

Lead SNP is reported with genomic location as indicated by chromosome (**Chr**) and base-pair (**BP**), as well as the total number of genes (**NTotal**) and significant genes (**Nsig**) in associated locus.



**Supplementary Table 7. RegulomeDB results.** Up to 30 most significant SNPs from each of the 27 loci identified in meta-analysis of GWAS across all cohorts were considered. Listed below are all SNPs with RegulomeDB score under 3, indicating their likely involvement in gene regulation. SNPs in bold are potential eQTLs.

| rsID             | Chr       | Base pair      | Cytoband     | RegulomeDB score | Interpretation                                                      | Genomic overlap                                                                                                 |
|------------------|-----------|----------------|--------------|------------------|---------------------------------------------------------------------|-----------------------------------------------------------------------------------------------------------------|
| rs3820282        | 1         | 22468215       | p36.12       | 2b               | TF binding + any motif + DNase Footprint + DNase peak               | Three WNT4 transcripts (intron variant)                                                                         |
| rs79050195       | 1         | 22349386       | p36.12       | 2b               | TF binding + any motif + DNase Footprint + DNase peak               | Four LINC00339 transcripts (upstream gene variant)<br>One RP1-224A6.3 transcript (downstream gene variant)      |
| rs12404660       | 1         | 22458794       | p36.12       | 2b               | TF binding + any motif + DNase Footprint + DNase peak               | Four WNT4 transcripts (intron variant/upstream gene variant)                                                    |
| rs4669746        | 2         | 11682018       | p25.1        | 2b               | TF binding + any motif + DNase Footprint + DNase peak               | Four GREB1 transcripts (intron variant/upstream gene variant)<br>One MIR4429 transcript (upstream gene variant) |
| rs353490         | 5         | 176433063      | q35.2        | 2b               | TF binding + any motif + DNase Footprint + DNase peak               | Eleven UIMC1 transcripts (intron variant)                                                                       |
| rs114760566      | 6         | 34192036       | p21.31       | 2b               | TF binding + any motif + DNase Footprint + DNase peak               | One CYCSP55 transcript (downstream gene variant)                                                                |
| rs12110479       | 6         | 152554396      | q25.2        | 2b               | TF binding + any motif + DNase Footprint + DNase peak               | Eight SYNE1 transcripts (intron variant)                                                                        |
| rs34800401       | 9         | 806736         | p24.3        | 2b               | TF binding + any motif + DNase Footprint + DNase peak               | Regulatory region variant (CTCF binding site)                                                                   |
| rs35469085       | 9         | 806912         | p24.3        | 2b               | TF binding + any motif + DNase Footprint + DNase peak               | Regulatory region variant (CTCF binding site)                                                                   |
| rs10815717       | 9         | 801571         | p24.3        | 2b               | TF binding + any motif + DNase Footprint + DNase peak               | Regulatory region variant (promoter flanking region)                                                            |
| rs10115078       | 9         | 802053         | p24.3        | 2b               | TF binding + any motif + DNase Footprint + DNase peak               | Regulatory region variant (promoter flanking region)                                                            |
| rs34379047       | 10        | 105644473      | q24.33       | 2b               | TF binding + any motif + DNase Footprint + DNase peak               | Four OBFC1 transcripts (intron variant)<br>One RP11-541N10.3 transcript (upstream gene variant)                 |
| <b>rs498217</b>  | <b>11</b> | <b>249097</b>  | <b>p15.5</b> | <b>1f</b>        | <b>eQTL + TF binding / DNase peak</b>                               | <b>Fourteen PSMD13 transcripts (intron variant/upstream gene variant/downstream gene variant)</b>               |
| rs4071558        | 11        | 30344591       | p14.1        | 2b               | TF binding + any motif + DNase Footprint + DNase peak               | Three ARL14EP transcripts (upstream gene variant)                                                               |
| rs7947350        | 11        | 30338842       | p14.1        | 2b               | TF binding + any motif + DNase Footprint + DNase peak               | Intergenic variant                                                                                              |
| rs7106353        | 11        | 32351427       | p13          | 2b               | TF binding + any motif + DNase Footprint + DNase peak               | One RP1-65P5.1 transcript (intron variant)                                                                      |
| rs36034326       | 11        | 107903818      | q22.3        | 2b               | TF binding + any motif + DNase Footprint + DNase peak               | Four CUL5 transcripts (intron variant)                                                                          |
| rs11183479       | 12        | 46824164       | q13.11       | 2b               | TF binding + any motif + DNase Footprint + DNase peak               | One RP11-96H19.1 transcript (intron variant)                                                                    |
| rs3936214        | 12        | 46825812       | q13.11       | 2b               | TF binding + any motif + DNase Footprint + DNase peak               | One RP11-96H19.1 transcript (intron variant)                                                                    |
| rs11183478       | 12        | 46824066       | q13.11       | 2b               | TF binding + any motif + DNase Footprint + DNase peak               | One RP11-96H19.1 transcript (intron variant)                                                                    |
| <b>rs1641528</b> | <b>17</b> | <b>7548320</b> | <b>p13.1</b> | <b>1b</b>        | <b>eQTL + TF binding + any motif + DNase Footprint + DNase peak</b> | <b>One ATP1B2 transcript (upstream gene variant)</b>                                                            |

|            |    |          |        |    |                                                       |                                                                                      |
|------------|----|----------|--------|----|-------------------------------------------------------|--------------------------------------------------------------------------------------|
| rs78378222 | 17 | 7571752  | p13.1  | 2b | TF binding + any motif + DNase Footprint + DNase peak | Eighteen TP53 transcripts<br>(3' UTR variant/intron variant/downstream gene variant) |
| rs4821942  | 22 | 40718100 | q13.11 | 2c | TF binding + matched TF motif + DNase peak            | Five TNRC6B transcripts (intron variant/downstream gene variant)                     |
